# Supplementary material
Source: PubMed Central journal article supplement (PMC3782086)
Supplement: NIHMS496544-supplement-1_si_001.pdf [file NIHMS496544-supplement-1_si_001.pdf]

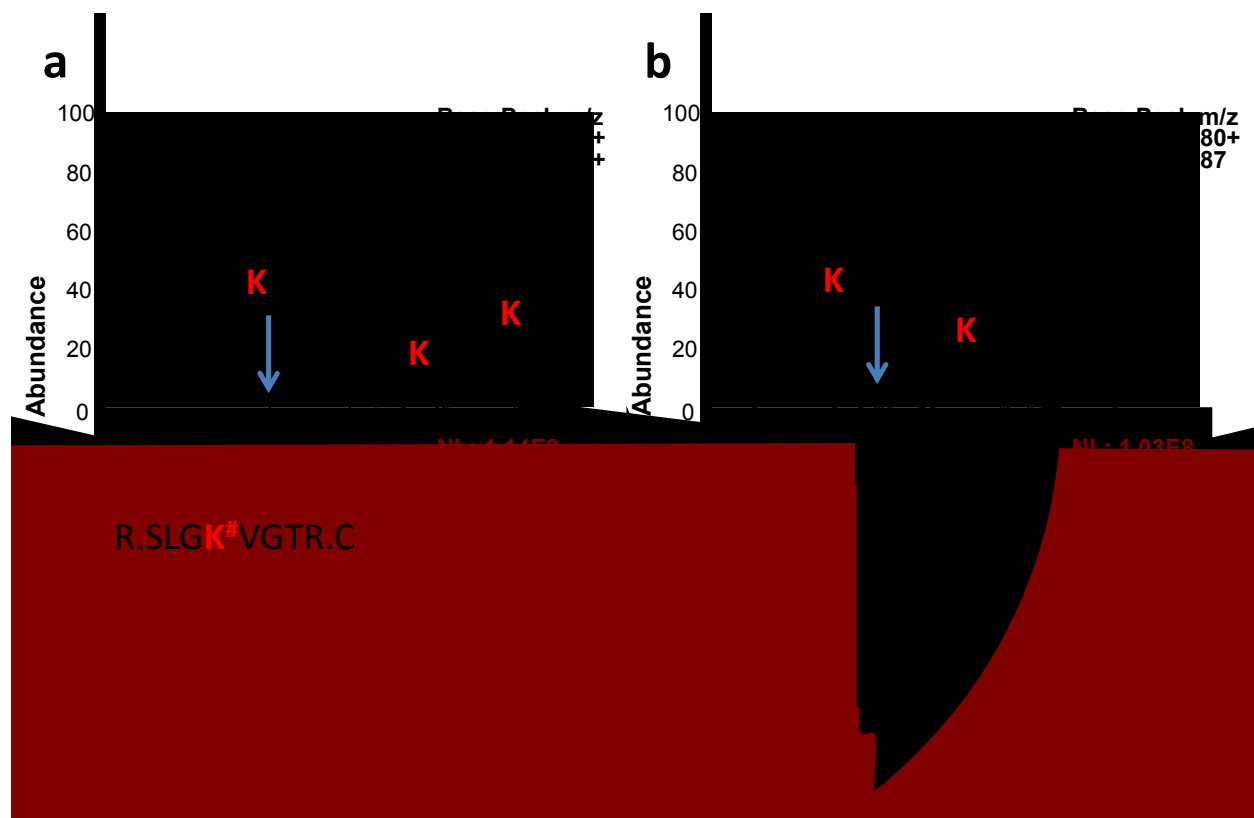

**Supplementary Figure 1.** Extracted ion chromatograms (XICs) showing the relative abundance of unlabeled (top) and SATA-labeled (bottom) peptide pairs from BSA. The labeled BSA was digested by trypsin and peptides were analyzed by LC-LTQ MS. All possible unlabeled forms of the peptides (top) were observed with <1% or <2% based on the peak area comparison between top and bottom panels.

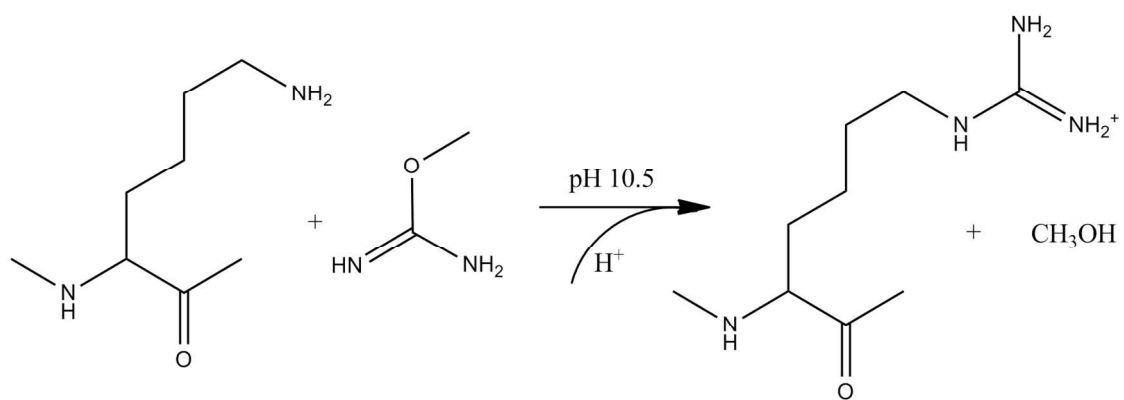

**Supplementary Figure 2.** The guanylation of lysine  $\epsilon$ -amine. The pKa of lysine is  $\sim 10.5$ . At pH  $\sim 10.5$ , lysine  $\epsilon$ -amine serves as a nucleophile to react with *O*-methylisourea.
